# Supplementary material for: Broadening risk profile in familial colorectal cancer type X; increased risk for five cancer types in the national Danish cohort
Source: Springer Nature journal article supplement (doi:10.1186/s12885-020-06859-5), 2020-04-22
Supplement: MOESM1 [file 17918908]

**Supplementary table 1** Extracolonic cancers in the entire and the surveilled FCCTX cohort

| Malignancy                   | Entire FCCTX cohort |                  |               | Surveilled FCCTX cohort |                  |               |
|------------------------------|---------------------|------------------|---------------|-------------------------|------------------|---------------|
|                              | Cancers             | Mean age (years) | Range (years) | Cancers                 | Mean age (years) | Range (years) |
| Breast cancer                | 103                 | 58.0             | 30-87         | 26                      | 61.6             | 36-87         |
| Prostate cancer              | 51                  | 70.7             | 55-94         | 19                      | 73.4             | 58-89         |
| Urothelial cancer            | 45                  | 69.7             | 28-89         | 21                      | 70.0             | 50-89         |
| Lung cancer                  | 40                  | 65.3             | 43-89         | 10                      | 62.5             | 46-78         |
| Malignant melanoma           | 25                  | 53.1             | 23-80         | 11                      | 51.1             | 23-80         |
| Non-melanoma skin cancer     | 22                  | 66.8             | 24-88         | 11                      | 69.7             | 47-88         |
| Brain tumours                | 22                  | 55.8             | 0-93          | 10                      | 61.5             | 24-93         |
| Pancreatic cancer            | 21                  | 73.0             | 61-89         | 3                       | 76.0             | 69-81         |
| Gastric cancer               | 20                  | 63.4             | 39-85         | 5                       | 69.2             | 48-85         |
| Ovarian cancer               | 17                  | 57.1             | 26-79         | 4                       | 58.3             | 49-66         |
| Lip and oropharyngeal cancer | 15                  | 63.1             | 47-89         | 5                       | 64.6             | 47-89         |
| Non-Hodgkin's lymphoma       | 15                  | 60.2             | 41-82         | 5                       | 55.6             | 41-74         |
| Endometrial cancer           | 11                  | 65.4             | 52-82         | 3                       | 58.0             | 52-66         |
| Kidney cancer                | 10                  | 62.7             | 47-74         | 2                       | 66.0             | 58-74         |
| Cervical cancer              | 9                   | 46.0             | 32-71         | 2                       | 50.5             | 49-52         |
| Leukemia                     | 8                   | 69.0             | 59-79         | 1                       | 70.0             | -             |
| Esophageal cancer            | 6                   | 70.5             | 50-91         | 1                       | 64.0             | -             |
| Soft tissue tumours          | 6                   | 53.7             | 36-71         | 3                       | 52.0             | 43-61         |
| Testis cancer                | 6                   | 34.0             | 27-36         | 2                       | 34.0             | 34-34         |
| Biliary tract cancer         | 5                   | 58.2             | 41-79         | 0                       | -                | -             |
| Laryngeal cancer             | 5                   | 62.0             | 53-73         | 2                       | 59.0             | 57-61         |
| Eye tumours                  | 5                   | 66.0             | 54-69         | 3                       | 65.3             | 61-69         |
| Multiple myeloma             | 5                   | 80.8             | 66-91         | 2                       | 85.0             | 79-91         |
| Hepatocellular cancer        | 4                   | 68.8             | 68-69         | 2                       | 68.5             | 68-69         |
| Other specified cancers      | 4                   | 61.0             | 61-65         | 2                       | 62.5             | 46-78         |
| Small bowel cancer           | 3                   | 66.0             | 49-86         | 1                       | 63.0             | -             |
| Vaginal and vulvar cancer    | 3                   | 59.3             | 47-73         | 1                       | 47.0             | -             |
| Cancer of the nose/sinuses   | 2                   | 50.0             | 29-71         | 1                       | 71.0             | -             |
| Thyroid cancer               | 2                   | 67.5             | 62-73         | 0                       | -                | -             |
| Pleural mesothelioma         | 1                   | 68.0             | -             | 1                       | 68.0             | -             |
| Bone cancer                  | 1                   | 28.0             | -             | 0                       | -                | -             |
| Hodgkin's lymphoma           | 1                   | 22.0             | -             | 1                       | 22.0             | -             |
| <b>Total</b>                 | <b>493</b>          | <b>59.8</b>      | <b>0-94</b>   | <b>160</b>              | <b>61.4</b>      | <b>23-93</b>  |

\*Other specified cancers included 4 cancers of the retroperitoneum
