# Supplementary material for: Broadening risk profile in familial colorectal cancer type X; increased risk for five cancer types in the national Danish cohort
Source: Springer Nature journal article supplement (doi:10.1186/s12885-020-06859-5), 2020-04-22
Supplement: MOESM2 [file 17918908]

**Supplementary Table 2** Age-dependent incidence rates of different cancer types in the entire FCCTX cohort and in the age and sex-matched population-based cohorts

| Cancer                                 | Age groups | FCCTX per 100000 years |              |              | Population-based cohort per 100000 years |              |              | FCCTX vs. Population-based cohort |              |              | P values       |
|----------------------------------------|------------|------------------------|--------------|--------------|------------------------------------------|--------------|--------------|-----------------------------------|--------------|--------------|----------------|
|                                        |            | IR                     | 95% CI lower | 95% CI Upper | IR                                       | 95% CI lower | 95% CI Upper | IRR                               | 95% CI lower | 95% CI Upper |                |
| <b>Breast cancer (n=103)</b>           | 0-29       | 0.00                   | 0.00         | 19.08        | 1.23                                     | 1.12         | 1.35         | 0.00                              | 0.00         | 21.39        | 1.0000         |
|                                        | 30-49      | 153.79                 | 102.99       | 220.86       | 90.00                                    | 88.87        | 91.15        | 1.71                              | 1.02         | 2.68         | <b>0.0070*</b> |
|                                        | 50-69      | 435.03                 | 326.81       | 567.62       | 283.38                                   | 281.13       | 285.64       | 1.54                              | 1.06         | 2.14         | <b>0.0030*</b> |
|                                        | 70+        | 445.01                 | 271.83       | 687.29       | 324.72                                   | 321.52       | 327.94       | 1.37                              | 0.72         | 2.34         | 0.1495         |
| <b>Prostate cancer (n=51)</b>          | 0-29       | 0.00                   | 0.00         | 18.99        | 0.01                                     | 0.00         | 0.02         | 0.00                              | 0.00         | 22512.58     | 1.0000         |
|                                        | 30-49      | 0.00                   | 0.00         | 19.26        | 1.57                                     | 1.43         | 1.73         | 0.00                              | 0.00         | 16.96        | 1.0000         |
|                                        | 50-69      | 210.97                 | 137.81       | 309.11       | 151.90                                   | 150.22       | 153.59       | 1.39                              | 0.80         | 2.23         | 0.1036         |
|                                        | 70+        | 742.25                 | 480.35       | 1095.71      | 621.85                                   | 616.44       | 627.30       | 1.19                              | 0.68         | 1.93         | 0.3799         |
| <b>Urothelial cancer (n=45)</b>        | 0-29       | 2.58                   | 0.07         | 14.35        | 0.26                                     | 0.22         | 0.30         | 10.01                             | 0.06         | 73.02        | 0.0955         |
|                                        | 30-49      | 2.62                   | 0.07         | 14.59        | 5.19                                     | 5.00         | 5.39         | 0.50                              | 0.00         | 3.62         | 1.0000         |
|                                        | 50-69      | 55.18                  | 30.17        | 92.59        | 61.32                                    | 60.57        | 62.07        | 0.90                              | 0.41         | 1.70         | 0.7999         |
|                                        | 70+        | 355.87                 | 238.33       | 511.09       | 169.09                                   | 167.30       | 170.89       | 2.10                              | 1.26         | 3.30         | <b>0.0003*</b> |
| <b>Lung cancer (n=40)</b>              | 0-29       | 0.00                   | 0.00         | 9.50         | 0.16                                     | 0.14         | 0.20         | 0.00                              | 0.00         | 81.72        | 1.0000         |
|                                        | 30-49      | 13.09                  | 4.25         | 30.55        | 10.92                                    | 10.64        | 11.20        | 1.20                              | 0.27         | 3.32         | 0.6186         |
|                                        | 50-69      | 74.75                  | 45.00        | 116.73       | 148.71                                   | 147.55       | 149.88       | 0.50                              | 0.26         | 0.87         | <b>0.0011*</b> |
|                                        | 70+        | 193.14                 | 110.40       | 313.65       | 299.16                                   | 296.78       | 301.55       | 0.65                              | 0.31         | 1.17         | 0.0864         |
| <b>Malignant melanoma (n=24)</b>       | 0-29       | 7.73                   | 1.59         | 22.59        | 3.28                                     | 3.15         | 3.42         | 2.36                              | 0.29         | 8.40         | 0.1370         |
|                                        | 30-49      | 23.59                  | 10.79        | 44.79        | 19.59                                    | 19.22        | 19.97        | 1.20                              | 0.43         | 2.63         | 0.5786         |
|                                        | 50-69      | 27.59                  | 11.09        | 56.84        | 34.72                                    | 34.16        | 35.29        | 0.79                              | 0.24         | 1.90         | 0.7341         |
|                                        | 70+        | 60.78                  | 19.73        | 141.83       | 47.71                                    | 46.76        | 48.67        | 1.27                              | 0.29         | 3.52         | 0.6058         |
| <b>Non-melanoma skin tumors (n=22)</b> | 0-29       | 2.58                   | 0.07         | 14.36        | 0.25                                     | 0.22         | 0.29         | 10.17                             | 0.06         | 74.22        | 0.0941         |
|                                        | 30-49      | 5.24                   | 0.63         | 18.92        | 2.69                                     | 2.56         | 2.83         | 1.95                              | 0.11         | 8.77         | 0.2747         |
|                                        | 50-69      | 39.39                  | 18.89        | 72.44        | 20.79                                    | 20.36        | 21.23        | 1.89                              | 0.73         | 3.98         | 0.0483         |
|                                        | 70+        | 109.83                 | 50.22        | 208.49       | 117.75                                   | 116.26       | 119.25       | 0.93                              | 0.34         | 2.03         | 1.0000         |
| <b>Brain tumours (n=22)</b>            | 0-29       | 7.73                   | 1.59         | 22.60        | 5.32                                     | 5.16         | 5.49         | 1.45                              | 0.18         | 5.18         | 0.4677         |
|                                        | 30-49      | 13.10                  | 4.25         | 30.57        | 14.80                                    | 14.48        | 15.13        | 0.89                              | 0.20         | 2.45         | 1.0000         |
|                                        | 50-69      | 31.47                  | 13.59        | 62.01        | 35.86                                    | 35.29        | 36.44        | 0.88                              | 0.29         | 2.00         | 0.8683         |
|                                        | 70+        | 72.50                  | 26.61        | 157.80       | 46.31                                    | 45.38        | 47.26        | 1.57                              | 0.42         | 4.00         | 0.2939         |
| <b>Pancreatic cancer (n=21)</b>        | 0-29       | 0.00                   | 0.00         | 9.51         | 0.04                                     | 0.03         | 0.06         | 0.00                              | 0.00         | 348.69       | 1.0000         |
|                                        | 30-49      | 0.00                   | 0.00         | 9.66         | 2.31                                     | 2.19         | 2.45         | 0.00                              | 0.00         | 5.75         | 1.0000         |
|                                        | 50-69      | 27.53                  | 11.07        | 56.72        | 26.24                                    | 25.76        | 26.74        | 1.05                              | 0.32         | 2.51         | 0.8450         |
|                                        | 70+        | 169.16                 | 92.48        | 283.82       | 76.49                                    | 75.29        | 77.71        | 2.21                              | 1.12         | 4.38         | <b>0.0023*</b> |
| <b>Gastric cancer (n=20)</b>           | 0-29       | 0.00                   | 0.00         | 9.50         | 0.10                                     | 0.08         | 0.12         | 0.00                              | 0.00         | 136.20       | 1.0000         |
|                                        | 30-49      | 15.71                  | 5.76         | 34.19        | 2.68                                     | 2.54         | 2.82         | 5.87                              | 1.57         | 15.02        | <b>0.0007*</b> |
|                                        | 50-69      | 15.73                  | 4.29         | 40.27        | 20.56                                    | 20.13        | 21.00        | 0.77                              | 0.14         | 2.35         | 0.8254         |
|                                        | 70+        | 120.69                 | 57.88        | 221.96       | 66.70                                    | 65.58        | 67.83        | 1.81                              | 0.70         | 3.80         | 0.0811         |

|                                        |       |       |       |        |       |       |       |       |      |         |        |
|----------------------------------------|-------|-------|-------|--------|-------|-------|-------|-------|------|---------|--------|
| <b>Ovarian cancer (n=17)</b>           | 0-29  | 10.31 | 1.25  | 37.26  | 1.01  | 0.91  | 1.12  | 10.20 | 0.59 | 46.32   | 0.0170 |
|                                        | 30-49 | 10.51 | 1.27  | 37.95  | 10.66 | 10.27 | 11.06 | 0.99  | 0.06 | 4.44    | 1.0000 |
|                                        | 50-69 | 69.27 | 31.67 | 131.49 | 47.75 | 46.83 | 48.68 | 1.45  | 0.52 | 3.16    | 0.2280 |
|                                        | 70+   | 84.24 | 22.95 | 215.70 | 63.23 | 61.82 | 64.66 | 1.33  | 0.24 | 4.09    | 0.5520 |
| <b>Non-Hodgkin's lymphoma (n=15)</b>   | 0-29  | 0.00  | 0.00  | 9.50   | 1.44  | 1.36  | 1.53  | 0.00  | 0.00 | 9.10    | 1.0000 |
|                                        | 30-49 | 7.86  | 1.62  | 22.96  | 6.44  | 6.23  | 6.66  | 1.22  | 0.15 | 4.34    | 0.7415 |
|                                        | 50-69 | 31.52 | 13.61 | 62.10  | 25.97 | 25.49 | 26.46 | 1.21  | 0.41 | 2.76    | 0.5543 |
|                                        | 70+   | 48.36 | 13.18 | 123.81 | 56.35 | 55.32 | 57.39 | 0.86  | 0.15 | 2.64    | 1.0000 |
| <b>Head and neck cancer (n=15)</b>     | 0-29  | 0.00  | 0.00  | 9.50   | 0.30  | 0.26  | 0.34  | 0.00  | 0.00 | 43.74   | 1.0000 |
|                                        | 30-49 | 5.24  | 0.63  | 18.91  | 5.28  | 5.09  | 5.47  | 0.99  | 0.06 | 4.47    | 1.0000 |
|                                        | 50-69 | 35.43 | 16.20 | 67.25  | 29.77 | 29.25 | 30.30 | 1.19  | 0.43 | 2.59    | 0.5812 |
|                                        | 70+   | 48.40 | 13.19 | 123.92 | 36.17 | 35.35 | 37.01 | 1.34  | 0.24 | 4.11    | 0.5511 |
| <b>Endometrial cancer (n=11)</b>       | 0-29  | 0.00  | 0.00  | 19.02  | 0.15  | 0.12  | 0.20  | 0.00  | 0.00 | 178.91  | 1.0000 |
|                                        | 30-49 | 0.00  | 0.00  | 19.37  | 5.35  | 5.08  | 5.64  | 0.00  | 0.00 | 4.99    | 0.6321 |
|                                        | 50-69 | 53.71 | 21.59 | 110.65 | 62.20 | 61.15 | 63.27 | 0.86  | 0.26 | 2.07    | 0.8605 |
|                                        | 70+   | 83.83 | 22.84 | 214.63 | 78.96 | 77.39 | 80.56 | 1.06  | 0.19 | 3.26    | 0.7940 |
| <b>Kidney cancer (n=10)</b>            | 0-29  | 0.00  | 0.00  | 9.50   | 0.48  | 0.43  | 0.53  | 0.00  | 0.00 | 27.39   | 1.0000 |
|                                        | 30-49 | 2.62  | 0.07  | 14.59  | 3.24  | 3.09  | 3.40  | 0.85  | 0.01 | 5.80    | 1.0000 |
|                                        | 50-69 | 23.59 | 8.66  | 51.35  | 21.65 | 21.21 | 22.10 | 1.11  | 0.29 | 2.78    | 0.8286 |
|                                        | 70+   | 36.18 | 7.46  | 105.75 | 43.13 | 42.23 | 44.05 | 0.86  | 0.10 | 2.99    | 1.0000 |
| <b>Cervical cancer (n=9)</b>           | 0-29  | 0.00  | 0.00  | 19.02  | 3.25  | 3.07  | 3.45  | 0.00  | 0.00 | 8.06    | 1.0000 |
|                                        | 30-49 | 26.34 | 8.55  | 61.47  | 25.75 | 25.15 | 26.37 | 1.02  | 0.23 | 2.83    | 0.8207 |
|                                        | 50-69 | 23.15 | 4.77  | 67.64  | 26.48 | 25.79 | 27.18 | 0.87  | 0.11 | 3.11    | 1.0000 |
|                                        | 70+   | 21.01 | 0.53  | 117.05 | 28.50 | 27.56 | 29.47 | 0.74  | 0.00 | 5.29    | 1.0000 |
| <b>Leukemia (n=7)</b>                  | 0-29  | 0.00  | 0.00  | 9.50   | 3.29  | 3.16  | 3.42  | 0.00  | 0.00 | 3.98    | 0.6436 |
|                                        | 30-49 | 0.00  | 0.00  | 9.66   | 4.16  | 3.99  | 4.33  | 0.00  | 0.00 | 3.20    | 0.4177 |
|                                        | 50-69 | 11.79 | 2.43  | 34.45  | 21.29 | 20.85 | 21.74 | 0.55  | 0.07 | 1.97    | 0.3915 |
|                                        | 70+   | 48.32 | 13.16 | 123.71 | 62.52 | 61.44 | 63.62 | 0.77  | 0.14 | 2.37    | 0.8250 |
| <b>Esophageal cancer (n=6)</b>         | 0-29  | 0.00  | 0.00  | 9.50   | 0.01  | 0.00  | 0.02  | 0.00  | 0.00 | 2014.24 | 1.0000 |
|                                        | 30-49 | 0.00  | 0.00  | 9.66   | 1.10  | 1.01  | 1.19  | 0.00  | 0.00 | 12.14   | 1.0000 |
|                                        | 50-69 | 15.72 | 4.28  | 40.25  | 13.19 | 12.84 | 13.54 | 1.19  | 0.21 | 3.66    | 0.5838 |
|                                        | 70+   | 24.17 | 2.93  | 87.33  | 27.20 | 26.49 | 27.93 | 0.89  | 0.05 | 4.00    | 1.0000 |
| <b>Connecting tissue tumours (n=6)</b> | 0-29  | 0.00  | 0.00  | 9.50   | 0.82  | 0.75  | 0.89  | 0.00  | 0.00 | 16.07   | 1.0000 |
|                                        | 30-49 | 5.24  | 0.63  | 18.92  | 2.00  | 1.88  | 2.12  | 2.62  | 0.15 | 11.84   | 0.1779 |
|                                        | 50-69 | 11.80 | 2.43  | 34.47  | 4.83  | 4.62  | 5.04  | 2.44  | 0.30 | 8.72    | 0.1267 |
|                                        | 70+   | 12.06 | 0.31  | 67.18  | 9.84  | 9.41  | 10.28 | 1.23  | 0.01 | 8.81    | 0.5578 |
| <b>Testis cancer (n=6)</b>             | 0-29  | 5.15  | 0.13  | 28.69  | 7.86  | 7.58  | 8.15  | 0.65  | 0.00 | 4.71    | 1.0000 |
|                                        | 30-49 | 26.21 | 8.51  | 61.17  | 19.36 | 18.85 | 19.89 | 1.35  | 0.31 | 3.74    | 0.4283 |
|                                        | 50-69 | 0.00  | 0.00  | 29.77  | 5.48  | 5.17  | 5.81  | 0.00  | 0.00 | 7.48    | 1.0000 |
|                                        | 70+   | 0.00  | 0.00  | 104.73 | 2.80  | 2.44  | 3.18  | 0.00  | 0.00 | 52.13   | 1.0000 |

|                                       |       |       |       |        |       |       |       |       |      |         |                |
|---------------------------------------|-------|-------|-------|--------|-------|-------|-------|-------|------|---------|----------------|
| <b>Biliary tract cancer (n=5)</b>     | 0-29  | 0.00  | 0.00  | 9.50   | 0.01  | 0.00  | 0.02  | 0.00  | 0.00 | 2014.24 | 1.0000         |
|                                       | 30-49 | 5.24  | 0.63  | 18.91  | 0.52  | 0.46  | 0.58  | 10.16 | 0.59 | 46.26   | 0.0172         |
|                                       | 50-69 | 7.86  | 0.95  | 28.39  | 6.01  | 5.78  | 6.25  | 1.31  | 0.08 | 5.89    | 0.6686         |
|                                       | 70+   | 12.06 | 0.31  | 67.18  | 22.92 | 22.26 | 23.58 | 0.53  | 0.00 | 3.78    | 1.0000         |
| <b>Eye tumours (n=5)</b>              | 0-29  | 0.00  | 0.00  | 9.50   | 0.32  | 0.28  | 0.37  | 0.00  | 0.00 | 40.95   | 1.0000         |
|                                       | 30-49 | 0.00  | 0.00  | 9.66   | 0.74  | 0.67  | 0.82  | 0.00  | 0.00 | 18.09   | 1.0000         |
|                                       | 50-69 | 19.66 | 6.38  | 45.88  | 2.54  | 2.39  | 2.70  | 7.73  | 1.76 | 21.45   | <b>0.0006*</b> |
|                                       | 70+   | 0.00  | 0.00  | 44.53  | 4.04  | 3.77  | 4.33  | 0.00  | 0.00 | 15.20   | 1.0000         |
| <b>Multiple myeloma (n=5)</b>         | 0-29  | 0.00  | 0.00  | 9.50   | 0.01  | 0.00  | 0.02  | 0.00  | 0.00 | 3328.36 | 1.0000         |
|                                       | 30-49 | 0.00  | 0.00  | 9.66   | 1.01  | 0.93  | 1.10  | 0.00  | 0.00 | 13.16   | 1.0000         |
|                                       | 50-69 | 3.93  | 0.10  | 21.89  | 10.20 | 9.90  | 10.51 | 0.39  | 0.00 | 2.77    | 0.5312         |
|                                       | 70+   | 48.28 | 13.16 | 123.62 | 26.70 | 25.99 | 27.42 | 1.81  | 0.32 | 5.56    | 0.1831         |
| <b>Laryngel cancer (n=5)</b>          | 0-29  | 0.00  | 0.00  | 9.50   | 0.02  | 0.01  | 0.03  | 0.00  | 0.00 | 761.64  | 1.0000         |
|                                       | 30-49 | 0.00  | 0.00  | 9.66   | 1.39  | 1.30  | 1.50  | 0.00  | 0.00 | 9.57    | 1.0000         |
|                                       | 50-69 | 15.73 | 4.28  | 40.27  | 12.63 | 12.30 | 12.98 | 1.24  | 0.22 | 3.82    | 0.5699         |
|                                       | 70+   | 12.08 | 0.31  | 67.32  | 14.47 | 13.95 | 15.01 | 0.83  | 0.01 | 6.00    | 1.0000         |
| <b>Hepatocellular cancer (n=4)</b>    | 0-29  | 0.00  | 0.00  | 9.50   | 0.17  | 0.14  | 0.20  | 0.00  | 0.00 | 79.03   | 1.0000         |
|                                       | 30-49 | 0.00  | 0.00  | 9.66   | 0.98  | 0.90  | 1.07  | 0.00  | 0.00 | 13.61   | 1.0000         |
|                                       | 50-69 | 15.72 | 4.28  | 40.24  | 10.13 | 9.83  | 10.44 | 1.55  | 0.28 | 4.77    | 0.3352         |
|                                       | 70+   | 0.00  | 0.00  | 44.48  | 25.96 | 25.26 | 26.67 | 0.00  | 0.00 | 2.36    | 0.2874         |
| <b>Small bowel cancer (n=3)</b>       | 0-29  | 0.00  | 0.00  | 9.50   | 0.03  | 0.02  | 0.05  | 0.00  | 0.00 | 467.06  | 1.0000         |
|                                       | 30-49 | 2.62  | 0.07  | 14.59  | 0.40  | 0.35  | 0.46  | 6.50  | 0.04 | 47.31   | 0.1432         |
|                                       | 50-69 | 3.93  | 0.10  | 21.90  | 2.86  | 2.70  | 3.03  | 1.37  | 0.01 | 9.88    | 0.5173         |
|                                       | 70+   | 12.06 | 0.31  | 67.20  | 6.32  | 5.98  | 6.68  | 1.91  | 0.01 | 13.72   | 0.4081         |
| <b>Vulva and vaginal cancer (n=3)</b> | 0-29  | 0.00  | 0.00  | 19.02  | 0.10  | 0.07  | 0.14  | 0.00  | 0.00 | 280.20  | 1.0000         |
|                                       | 30-49 | 5.25  | 0.13  | 29.25  | 1.73  | 1.58  | 1.90  | 3.03  | 0.02 | 21.87   | 0.2818         |
|                                       | 50-69 | 7.67  | 0.19  | 42.76  | 6.69  | 6.35  | 7.05  | 1.15  | 0.01 | 8.25    | 0.5819         |
|                                       | 70+   | 20.96 | 0.53  | 116.79 | 21.85 | 21.02 | 22.70 | 0.96  | 0.01 | 6.89    | 1.0000         |
| <b>Thyroid cancer (n=2)</b>           | 0-29  | 0.00  | 0.00  | 9.50   | 0.72  | 0.66  | 0.78  | 0.00  | 0.00 | 18.24   | 1.0000         |
|                                       | 30-49 | 0.00  | 0.00  | 9.66   | 3.31  | 3.16  | 3.46  | 0.00  | 0.00 | 4.02    | 0.6427         |
|                                       | 50-69 | 3.93  | 0.10  | 21.90  | 4.10  | 3.91  | 4.30  | 0.96  | 0.01 | 6.89    | 1.0000         |
|                                       | 70+   | 12.07 | 0.31  | 67.24  | 6.37  | 6.02  | 6.72  | 1.90  | 0.01 | 13.64   | 0.4101         |
| <b>Nose and sinuses (n=2)</b>         | 0-29  | 2.58  | 0.07  | 14.35  | 0.06  | 0.04  | 0.08  | 45.04 | 0.28 | 348.07  | 0.0225         |
|                                       | 30-49 | 0.00  | 0.00  | 9.66   | 0.43  | 0.38  | 0.49  | 0.00  | 0.00 | 31.20   | 1.0000         |
|                                       | 50-69 | 0.00  | 0.00  | 14.49  | 2.39  | 2.24  | 2.54  | 0.00  | 0.00 | 8.37    | 1.0000         |
|                                       | 70+   | 12.07 | 0.31  | 67.24  | 4.76  | 4.46  | 5.07  | 2.54  | 0.02 | 18.25   | 0.3262         |
| <b>Pleural mesothelioma (n=1)</b>     | 0-29  | 0.00  | 0.00  | 9.50   | 0.01  | 0.01  | 0.02  | 0.00  | 0.00 | 1433.01 | 1.0000         |
|                                       | 30-49 | 0.00  | 0.00  | 9.66   | 0.30  | 0.26  | 0.35  | 0.00  | 0.00 | 45.09   | 1.0000         |
|                                       | 50-69 | 3.93  | 0.10  | 21.89  | 3.47  | 3.29  | 3.65  | 1.13  | 0.01 | 8.14    | 0.5867         |
|                                       | 70+   | 0.00  | 0.00  | 44.48  | 7.17  | 6.80  | 7.55  | 0.00  | 0.00 | 8.55    | 1.0000         |

|                                       |       |      |      |       |      |      |      |      |      |       |        |
|---------------------------------------|-------|------|------|-------|------|------|------|------|------|-------|--------|
| <b>Bone cancer/osteosarcoma (n=1)</b> | 0-29  | 2.58 | 0.07 | 14.35 | 0.84 | 0.78 | 0.91 | 3.07 | 0.02 | 22.11 | 0.2786 |
|                                       | 30-49 | 0.00 | 0.00 | 9.66  | 0.68 | 0.61 | 0.75 | 0.00 | 0.00 | 19.68 | 1.0000 |
|                                       | 50-69 | 0.00 | 0.00 | 14.49 | 1.02 | 0.93 | 1.13 | 0.00 | 0.00 | 19.59 | 1.0000 |
|                                       | 70+   | 0.00 | 0.00 | 44.48 | 1.71 | 1.53 | 1.90 | 0.00 | 0.00 | 36.15 | 1.0000 |
| <b>Hodgkin's lymphoma (n=1)</b>       | 0-29  | 2.58 | 0.07 | 14.36 | 2.02 | 1.92 | 2.13 | 1.27 | 0.01 | 9.16  | 0.5440 |
|                                       | 30-49 | 0.00 | 0.00 | 9.66  | 2.52 | 2.39 | 2.66 | 0.00 | 0.00 | 5.29  | 1.0000 |
|                                       | 50-69 | 0.00 | 0.00 | 14.49 | 2.63 | 2.48 | 2.79 | 0.00 | 0.00 | 7.60  | 1.0000 |
|                                       | 70+   | 0.00 | 0.00 | 44.48 | 3.43 | 3.18 | 3.70 | 0.00 | 0.00 | 17.90 | 1.0000 |

\*Significant p values following Bonferoni correction

























































































































---

---

---

---

---

---

---

---

---

---

---

---

---

---

---

---

---

---

---

---
