# Supplementary material for: Broadening risk profile in familial colorectal cancer type X; increased risk for five cancer types in the national Danish cohort
Source: Springer Nature journal article supplement (doi:10.1186/s12885-020-06859-5), 2020-04-22
Supplement: MOESM3 [file 17918908]

A

| Malignancy        | Number in affected* | Mean age (range) | Number in FDR | Mean age (range) | Number in SDR | Mean age (range) |
|-------------------|---------------------|------------------|---------------|------------------|---------------|------------------|
| Breast cancer     | 19                  | 63.9 (45-86)     | 70            | 58.0 (30-87)     | 15            | 51.7 (31-73)     |
| Urothelial cancer | 9                   | 71.0 (57-83)     | 32            | 70.9 (44-89)     | 4             | 57.5 (28-76)     |
| Lung cancer       | 4                   | 71.5 (65-78)     | 33            | 65.9 (43-89)     | 3             | 50.7 (46-57)     |
| Pancreatic cancer | 6                   | 73.7 (62-88)     | 15            | 72.8 (61-89)     | 0             | -                |
| Gastric cancer    | 5                   | 66.0 (48-85)     | 13            | 64.0 (39-79)     | 2             | 53.0 (44-62)     |
| Eye tumours       | 1                   | 67 (-)           | 3             | 61.3 (54-69)     | 1             | 66 (-)           |

\*Affected with colorectal cancer

FDR: first-degree relative to an individual with colorectal cancer

SDR: second-degree relative to an individual with colorectal cancer

B

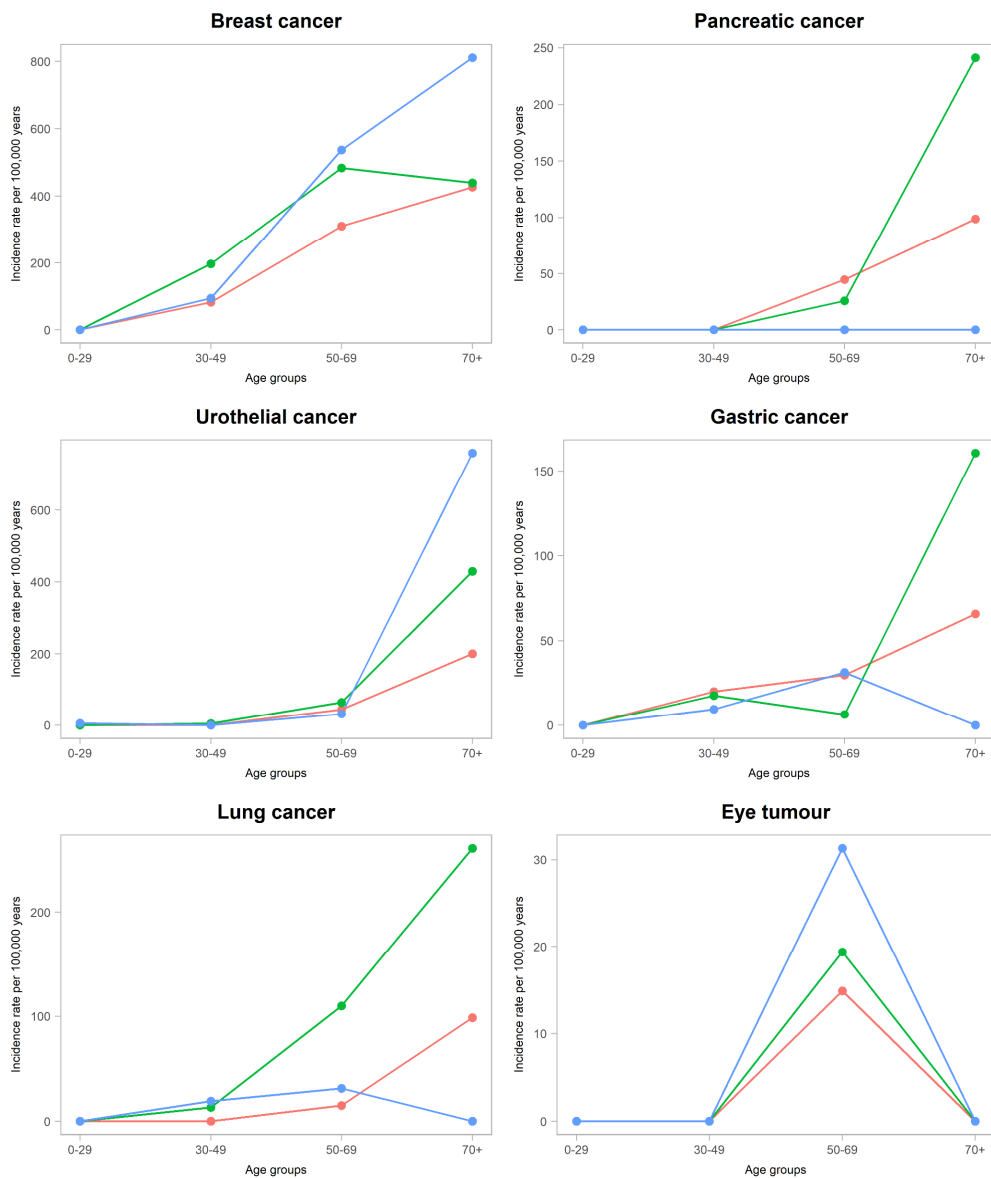

**Supplementary figure 1** Impact from degree of relatedness in FCCTX families in the 6 extra-colorectal cancer types that were significantly different from the population-based cohort. A) Table showing the number of cancers observed and the mean age at onset in individuals affected with colorectal cancer, their first-degree relatives and their second-degree relatives. B) Incidence rates calculated separately in individuals affected by colorectal cancer (red), first-degree relatives (blue) and second-degree relatives (green). No significant differences were observed. Incidence rates and p values are available upon request.
