# Supplementary material for: Broadening risk profile in familial colorectal cancer type X; increased risk for five cancer types in the national Danish cohort
Source: Springer Nature journal article supplement (doi:10.1186/s12885-020-06859-5), 2020-04-22
Supplement: MOESM4 [file 17918908]

**Supplementary Table 3** Age-dependent incidence rates of different cancer types in the surveilled FCCTX cohort and in the age and sex-matched population-based cohorts

| Cancer                                  | Age groups | FCCTX per 100000 years |              |              | Population-based cohort per 100000 years |              |              | FCCTX vs. Population-based cohort |              |              |                |
|-----------------------------------------|------------|------------------------|--------------|--------------|------------------------------------------|--------------|--------------|-----------------------------------|--------------|--------------|----------------|
|                                         |            | IR                     | 95% CI lower | 95% CI Upper | IR                                       | 95% CI lower | 95% CI Upper | IRR                               | 95% CI lower | 95% CI Upper | P values       |
| <b>Breast cancer (n=26)</b>             | 0-29       | 0.00                   | 0.00         | 111.91       | 1.23                                     | 1.12         | 1.35         | 0.00                              | 0.00         | 125.47       | 1.0000         |
|                                         | 30-49      | 94.31                  | 30.62        | 220.10       | 90.00                                    | 88.87        | 91.15        | 1.05                              | 0.24         | 2.90         | 0.8171         |
|                                         | 50-69      | 313.69                 | 171.50       | 526.32       | 283.38                                   | 281.13       | 285.64       | 1.11                              | 0.51         | 2.09         | 0.6714         |
|                                         | 70+        | 434.11                 | 174.53       | 894.43       | 324.72                                   | 321.52       | 327.94       | 1.34                              | 0.41         | 3.20         | 0.3792         |
| <b>Urothelial cancer (n=21)</b>         | 0-29       | 0.00                   | 0.00         | 55.74        | 0.26                                     | 0.22         | 0.30         | 0.00                              | 0.00         | 301.96       | 1.0000         |
|                                         | 30-49      | 0.00                   | 0.00         | 34.66        | 5.19                                     | 5.00         | 5.39         | 0.00                              | 0.00         | 9.19         | 1.0000         |
|                                         | 50-69      | 82.09                  | 33.00        | 169.13       | 61.32                                    | 60.57        | 62.07        | 1.34                              | 0.41         | 3.21         | 0.3786         |
|                                         | 70+        | 496.50                 | 271.44       | 833.03       | 169.09                                   | 167.30       | 170.89       | 2.94                              | 1.34         | 5.54         | <b>0.0004*</b> |
| <b>Prostate cancer (n=19)</b>           | 0-29       | 0.00                   | 0.00         | 111.04       | 0.01                                     | 0.00         | 0.02         | 0.00                              | 0.00         | 131626.08    | 1.0000         |
|                                         | 30-49      | 0.00                   | 0.00         | 69.20        | 1.57                                     | 1.43         | 1.73         | 0.00                              | 0.00         | 60.93        | 1.0000         |
|                                         | 50-69      | 199.66                 | 86.20        | 393.40       | 151.90                                   | 150.22       | 153.59       | 1.31                              | 0.44         | 2.99         | 0.4116         |
|                                         | 70+        | 950.29                 | 474.38       | 1700.33      | 621.85                                   | 616.44       | 627.30       | 1.53                              | 0.62         | 3.11         | 0.1852         |
| <b>Malignant melanoma (n=11)</b>        | 0-29       | 30.26                  | 3.66         | 109.31       | 3.28                                     | 3.15         | 3.42         | 9.22                              | 0.54         | 41.53        | 0.0204         |
|                                         | 30-49      | 37.63                  | 10.25        | 96.34        | 19.59                                    | 19.22        | 19.97        | 1.92                              | 0.34         | 5.90         | 0.1581         |
|                                         | 50-69      | 23.42                  | 2.84         | 84.59        | 34.72                                    | 34.16        | 35.29        | 0.67                              | 0.04         | 3.03         | 1.0000         |
|                                         | 70+        | 106.13                 | 21.89        | 310.15       | 47.71                                    | 46.76        | 48.67        | 2.22                              | 0.27         | 7.92         | 0.1543         |
| <b>Non-melanoma skin tumours (n=11)</b> | 0-29       | 0.00                   | 0.00         | 55.74        | 0.25                                     | 0.22         | 0.29         | 0.00                              | 0.00         | 306.90       | 1.0000         |
|                                         | 30-49      | 9.40                   | 0.24         | 52.36        | 2.69                                     | 2.56         | 2.83         | 3.49                              | 0.02         | 25.10        | 0.2492         |
|                                         | 50-69      | 58.67                  | 19.05        | 136.93       | 20.79                                    | 20.36        | 21.23        | 2.82                              | 0.64         | 7.80         | 0.0344         |
|                                         | 70+        | 177.04                 | 57.49        | 413.16       | 117.75                                   | 116.26       | 119.25       | 1.50                              | 0.34         | 4.16         | 0.3976         |
| <b>Lung cancer (n=10)</b>               | 0-29       | 0.00                   | 0.00         | 55.74        | 0.16                                     | 0.14         | 0.20         | 0.00                              | 0.00         | 479.30       | 1.0000         |
|                                         | 30-49      | 28.19                  | 5.81         | 82.39        | 10.92                                    | 10.64        | 11.20        | 2.58                              | 0.32         | 9.20         | 0.1125         |
|                                         | 50-69      | 35.09                  | 7.24         | 102.55       | 148.71                                   | 147.55       | 149.88       | 0.24                              | 0.03         | 0.84         | <b>0.0028*</b> |
|                                         | 70+        | 140.43                 | 38.26        | 359.55       | 299.16                                   | 296.78       | 301.55       | 0.47                              | 0.08         | 1.44         | 0.1656         |
| <b>Brain cancer (n=10)</b>              | 0-29       | 15.11                  | 0.38         | 84.19        | 5.32                                     | 5.16         | 5.49         | 2.84                              | 0.02         | 20.40        | 0.2968         |
|                                         | 30-49      | 18.80                  | 2.28         | 67.90        | 14.80                                    | 14.48        | 15.13        | 1.27                              | 0.07         | 5.72         | 0.6739         |
|                                         | 50-69      | 35.10                  | 7.24         | 102.57       | 35.86                                    | 35.29        | 36.44        | 0.98                              | 0.12         | 3.48         | 1.0000         |
|                                         | 70+        | 140.76                 | 38.35        | 360.39       | 46.31                                    | 45.38        | 47.26        | 3.04                              | 0.54         | 9.33         | 0.0447         |
| <b>Non-Hodgkin's lymphoma (n=5)</b>     | 0-29       | 0.00                   | 0.00         | 55.74        | 1.44                                     | 1.36         | 1.53         | 0.00                              | 0.00         | 53.35        | 1.0000         |
|                                         | 30-49      | 9.40                   | 0.24         | 52.39        | 6.44                                     | 6.23         | 6.66         | 1.46                              | 0.01         | 10.48        | 0.4962         |
|                                         | 50-69      | 35.13                  | 7.25         | 102.68       | 25.97                                    | 25.49        | 26.46        | 1.35                              | 0.17         | 4.82         | 0.4909         |
|                                         | 70+        | 35.08                  | 0.89         | 195.44       | 56.35                                    | 55.32        | 57.39        | 0.62                              | 0.00         | 4.47         | 1.0000         |
| <b>Head and neck cancer (n=5)</b>       | 0-29       | 0.00                   | 0.00         | 55.74        | 0.30                                     | 0.26         | 0.34         | 0.00                              | 0.00         | 256.56       | 1.0000         |
|                                         | 30-49      | 9.40                   | 0.24         | 52.36        | 5.28                                     | 5.09         | 5.47         | 1.78                              | 0.01         | 12.79        | 0.4298         |
|                                         | 50-69      | 23.40                  | 2.83         | 84.52        | 29.77                                    | 29.25        | 30.30        | 0.79                              | 0.05         | 3.54         | 1.0000         |
|                                         | 70+        | 70.41                  | 8.53         | 254.33       | 36.17                                    | 35.35        | 37.01        | 1.95                              | 0.11         | 8.76         | 0.2744         |

|                                        |       |        |       |        |       |       |       |       |      |         |                |
|----------------------------------------|-------|--------|-------|--------|-------|-------|-------|-------|------|---------|----------------|
| <b>Gastric cancer (n=5)</b>            | 0-29  | 0.00   | 0.00  | 55.74  | 0.10  | 0.08  | 0.12  | 0.00  | 0.00 | 798.79  | 1.0000         |
|                                        | 30-49 | 9.40   | 0.24  | 52.35  | 2.68  | 2.54  | 2.82  | 3.51  | 0.02 | 25.24   | 0.2481         |
|                                        | 50-69 | 11.70  | 0.30  | 65.16  | 20.56 | 20.13 | 21.00 | 0.57  | 0.00 | 4.08    | 1.0000         |
|                                        | 70+   | 105.33 | 21.72 | 307.81 | 66.70 | 65.58 | 67.83 | 1.58  | 0.19 | 5.62    | 0.4458         |
| <b>Ovarian cancer (n=4)</b>            | 0-29  | 0.00   | 0.00  | 111.91 | 1.01  | 0.91  | 1.12  | 0.00  | 0.00 | 153.31  | 1.0000         |
|                                        | 30-49 | 18.82  | 0.48  | 104.88 | 10.66 | 10.27 | 11.06 | 1.77  | 0.01 | 12.69   | 0.4324         |
|                                        | 50-69 | 66.67  | 13.75 | 194.83 | 47.75 | 46.83 | 48.68 | 1.40  | 0.17 | 4.97    | 0.4801         |
|                                        | 70+   | 0.00   | 0.00  | 224.31 | 63.23 | 61.82 | 64.66 | 0.00  | 0.00 | 4.88    | 0.6324         |
| <b>Endometrial cancer (n=3)</b>        | 0-29  | 0.00   | 0.00  | 111.91 | 0.15  | 0.12  | 0.20  | 0.00  | 0.00 | 1052.60 | 1.0000         |
|                                        | 30-49 | 0.00   | 0.00  | 69.43  | 5.35  | 5.08  | 5.64  | 0.00  | 0.00 | 17.89   | 1.0000         |
|                                        | 50-69 | 66.41  | 13.70 | 194.08 | 62.20 | 61.15 | 63.27 | 1.07  | 0.13 | 3.80    | 0.7623         |
|                                        | 70+   | 0.00   | 0.00  | 224.31 | 78.96 | 77.39 | 80.56 | 0.00  | 0.00 | 3.91    | 0.6456         |
| <b>Pancreas cancer (n=3)</b>           | 0-29  | 0.00   | 0.00  | 55.74  | 0.04  | 0.03  | 0.06  | 0.00  | 0.00 | 2045.06 | 1.0000         |
|                                        | 30-49 | 0.00   | 0.00  | 34.66  | 2.31  | 2.19  | 2.45  | 0.00  | 0.00 | 20.65   | 1.0000         |
|                                        | 50-69 | 11.69  | 0.30  | 65.14  | 26.24 | 25.76 | 26.74 | 0.45  | 0.00 | 3.20    | 0.7330         |
|                                        | 70+   | 70.19  | 8.50  | 253.55 | 76.49 | 75.29 | 77.71 | 0.92  | 0.05 | 4.13    | 1.0000         |
| <b>Connecting tissue tumours (n=3)</b> | 0-29  | 0.00   | 0.00  | 55.74  | 0.82  | 0.75  | 0.89  | 0.00  | 0.00 | 94.25   | 1.0000         |
|                                        | 30-49 | 9.40   | 0.24  | 52.35  | 2.00  | 1.88  | 2.12  | 4.71  | 0.03 | 33.89   | 0.1915         |
|                                        | 50-69 | 23.39  | 2.83  | 84.51  | 4.83  | 4.62  | 5.04  | 4.85  | 0.28 | 21.84   | 0.0650         |
|                                        | 70+   | 0.00   | 0.00  | 129.39 | 9.84  | 9.41  | 10.28 | 0.00  | 0.00 | 18.12   | 1.0000         |
| <b>Eye tumours (n=3)</b>               | 0-29  | 0.00   | 0.00  | 55.74  | 0.32  | 0.28  | 0.37  | 0.00  | 0.00 | 240.15  | 1.0000         |
|                                        | 30-49 | 0.00   | 0.00  | 34.66  | 0.74  | 0.67  | 0.82  | 0.00  | 0.00 | 64.93   | 1.0000         |
|                                        | 50-69 | 35.11  | 7.24  | 102.61 | 2.54  | 2.39  | 2.70  | 13.81 | 1.68 | 49.32   | <b>0.0015*</b> |
|                                        | 70+   | 0.00   | 0.00  | 129.47 | 4.04  | 3.77  | 4.33  | 0.00  | 0.00 | 44.19   | 1.0000         |
| <b>Hepatocellular cancer (n=2)</b>     | 0-29  | 0.00   | 0.00  | 55.74  | 0.17  | 0.14  | 0.20  | 0.00  | 0.00 | 463.52  | 1.0000         |
|                                        | 30-49 | 0.00   | 0.00  | 34.66  | 0.98  | 0.90  | 1.07  | 0.00  | 0.00 | 48.83   | 1.0000         |
|                                        | 50-69 | 23.38  | 2.83  | 84.47  | 10.13 | 9.83  | 10.44 | 2.31  | 0.13 | 10.39   | 0.2153         |
|                                        | 70+   | 0.00   | 0.00  | 129.43 | 25.96 | 25.26 | 26.67 | 0.00  | 0.00 | 6.86    | 1.0000         |
| <b>Laryngeal cancer (n=2)</b>          | 0-29  | 0.00   | 0.00  | 55.74  | 0.02  | 0.01  | 0.03  | 0.00  | 0.00 | 4467.07 | 1.0000         |
|                                        | 30-49 | 0.00   | 0.00  | 34.66  | 1.39  | 1.30  | 1.50  | 0.00  | 0.00 | 34.34   | 1.0000         |
|                                        | 50-69 | 23.40  | 2.83  | 84.53  | 12.63 | 12.30 | 12.98 | 1.85  | 0.11 | 8.34    | 0.2936         |
|                                        | 70+   | 0.00   | 0.00  | 129.39 | 14.47 | 13.95 | 15.01 | 0.00  | 0.00 | 12.31   | 1.0000         |
| <b>Cervical cancer (n=2)</b>           | 0-29  | 0.00   | 0.00  | 111.91 | 3.25  | 3.07  | 3.45  | 0.00  | 0.00 | 47.42   | 1.0000         |
|                                        | 30-49 | 18.82  | 0.48  | 104.87 | 25.75 | 25.15 | 26.37 | 0.73  | 0.00 | 5.25    | 1.0000         |
|                                        | 50-69 | 22.16  | 0.56  | 123.49 | 26.48 | 25.79 | 27.18 | 0.84  | 0.01 | 6.01    | 1.0000         |
|                                        | 70+   | 0.00   | 0.00  | 224.31 | 28.50 | 27.56 | 29.47 | 0.00  | 0.00 | 10.83   | 1.0000         |
| <b>Testis cancer (n=2)</b>             | 0-29  | 0.00   | 0.00  | 111.04 | 7.86  | 7.58  | 8.15  | 0.00  | 0.00 | 19.45   | 1.0000         |
|                                        | 30-49 | 37.57  | 4.55  | 135.71 | 19.36 | 18.85 | 19.89 | 1.94  | 0.11 | 8.73    | 0.2756         |
|                                        | 50-69 | 0.00   | 0.00  | 91.40  | 5.48  | 5.17  | 5.81  | 0.00  | 0.00 | 22.98   | 1.0000         |
|                                        | 70+   | 0.00   | 0.00  | 305.78 | 2.80  | 2.44  | 3.18  | 0.00  | 0.00 | 152.20  | 1.0000         |

|                                       |       |       |      |        |       |       |       |       |      |          |        |
|---------------------------------------|-------|-------|------|--------|-------|-------|-------|-------|------|----------|--------|
| <b>Kidney cancer (n=2)</b>            | 0-29  | 0.00  | 0.00 | 55.74  | 0.48  | 0.43  | 0.53  | 0.00  | 0.00 | 160.67   | 1.0000 |
|                                       | 30-49 | 0.00  | 0.00 | 34.66  | 3.24  | 3.09  | 3.40  | 0.00  | 0.00 | 14.72    | 1.0000 |
|                                       | 50-69 | 11.70 | 0.30 | 65.16  | 21.65 | 21.21 | 22.10 | 0.54  | 0.00 | 3.88     | 1.0000 |
|                                       | 70+   | 35.10 | 0.89 | 195.54 | 43.13 | 42.23 | 44.05 | 0.81  | 0.01 | 5.84     | 1.0000 |
| <b>Multiple myeloma (n=2)</b>         | 0-29  | 0.00  | 0.00 | 55.74  | 0.01  | 0.00  | 0.02  | 0.00  | 0.00 | 19521.01 | 1.0000 |
|                                       | 30-49 | 0.00  | 0.00 | 34.66  | 1.01  | 0.93  | 1.10  | 0.00  | 0.00 | 47.22    | 1.0000 |
|                                       | 50-69 | 0.00  | 0.00 | 43.13  | 10.20 | 9.90  | 10.51 | 0.00  | 0.00 | 5.82     | 1.0000 |
|                                       | 70+   | 70.29 | 8.51 | 253.92 | 26.70 | 25.99 | 27.42 | 2.63  | 0.15 | 11.85    | 0.1769 |
| <b>Leukemia (n=1)</b>                 | 0-29  | 0.00  | 0.00 | 55.74  | 3.29  | 3.16  | 3.42  | 0.00  | 0.00 | 23.36    | 1.0000 |
|                                       | 30-49 | 0.00  | 0.00 | 34.66  | 4.16  | 3.99  | 4.33  | 0.00  | 0.00 | 11.48    | 1.0000 |
|                                       | 50-69 | 0.00  | 0.00 | 43.13  | 21.29 | 20.85 | 21.74 | 0.00  | 0.00 | 2.79     | 0.2739 |
|                                       | 70+   | 35.13 | 0.89 | 195.76 | 62.52 | 61.44 | 63.62 | 0.56  | 0.00 | 4.03     | 1.0000 |
| <b>Hodgkin's lymphoma (n=1)</b>       | 0-29  | 15.13 | 0.38 | 84.28  | 2.02  | 1.92  | 2.13  | 7.48  | 0.05 | 53.79    | 0.1252 |
|                                       | 30-49 | 0.00  | 0.00 | 34.68  | 2.52  | 2.39  | 2.66  | 0.00  | 0.00 | 18.98    | 1.0000 |
|                                       | 50-69 | 0.00  | 0.00 | 43.13  | 2.63  | 2.48  | 2.79  | 0.00  | 0.00 | 22.62    | 1.0000 |
|                                       | 70+   | 0.00  | 0.00 | 129.39 | 3.43  | 3.18  | 3.70  | 0.00  | 0.00 | 52.08    | 1.0000 |
| <b>Esophageal cancer (n=1)</b>        | 0-29  | 0.00  | 0.00 | 55.74  | 0.01  | 0.00  | 0.02  | 0.00  | 0.00 | 11813.64 | 1.0000 |
|                                       | 30-49 | 0.00  | 0.00 | 34.66  | 1.10  | 1.01  | 1.19  | 0.00  | 0.00 | 43.56    | 1.0000 |
|                                       | 50-69 | 11.70 | 0.30 | 65.18  | 13.19 | 12.84 | 13.54 | 0.89  | 0.01 | 6.37     | 1.0000 |
|                                       | 70+   | 0.00  | 0.00 | 130.22 | 27.20 | 26.49 | 27.93 | 0.00  | 0.00 | 6.59     | 1.0000 |
| <b>Small bowel cancer (n=1)</b>       | 0-29  | 0.00  | 0.00 | 55.74  | 0.03  | 0.02  | 0.05  | 0.00  | 0.00 | 2739.32  | 1.0000 |
|                                       | 30-49 | 0.00  | 0.00 | 34.66  | 0.40  | 0.35  | 0.46  | 0.00  | 0.00 | 119.76   | 1.0000 |
|                                       | 50-69 | 11.70 | 0.30 | 65.19  | 2.86  | 2.70  | 3.03  | 4.09  | 0.03 | 29.42    | 0.2171 |
|                                       | 70+   | 0.00  | 0.00 | 129.53 | 6.32  | 5.98  | 6.68  | 0.00  | 0.00 | 28.24    | 1.0000 |
| <b>Pleural mesothelioma (n=1)</b>     | 0-29  | 0.00  | 0.00 | 55.74  | 0.01  | 0.01  | 0.02  | 0.00  | 0.00 | 8404.69  | 1.0000 |
|                                       | 30-49 | 0.00  | 0.00 | 34.66  | 0.30  | 0.26  | 0.35  | 0.00  | 0.00 | 161.82   | 1.0000 |
|                                       | 50-69 | 11.69 | 0.30 | 65.14  | 3.47  | 3.29  | 3.65  | 3.37  | 0.02 | 24.23    | 0.2569 |
|                                       | 70+   | 0.00  | 0.00 | 129.39 | 7.17  | 6.80  | 7.55  | 0.00  | 0.00 | 24.88    | 1.0000 |
| <b>Vaginal and vulva cancer (n=1)</b> | 0-29  | 0.00  | 0.00 | 111.91 | 0.10  | 0.07  | 0.14  | 0.00  | 0.00 | 1648.57  | 1.0000 |
|                                       | 30-49 | 18.83 | 0.48 | 104.92 | 1.73  | 1.58  | 1.90  | 10.86 | 0.07 | 78.43    | 0.0882 |
|                                       | 50-69 | 0.00  | 0.00 | 81.72  | 6.69  | 6.35  | 7.05  | 0.00  | 0.00 | 16.83    | 1.0000 |
|                                       | 70+   | 0.00  | 0.00 | 224.31 | 21.85 | 21.02 | 22.70 | 0.00  | 0.00 | 14.14    | 1.0000 |
| <b>Nose and sinuses (n=1)</b>         | 0-29  | 0.00  | 0.00 | 55.74  | 0.06  | 0.04  | 0.08  | 0.00  | 0.00 | 1425.04  | 1.0000 |
|                                       | 30-49 | 0.00  | 0.00 | 34.66  | 0.43  | 0.38  | 0.49  | 0.00  | 0.00 | 111.97   | 1.0000 |
|                                       | 50-69 | 0.00  | 0.00 | 43.13  | 2.39  | 2.24  | 2.54  | 0.00  | 0.00 | 24.90    | 1.0000 |
|                                       | 70+   | 35.17 | 0.89 | 195.98 | 4.76  | 4.46  | 5.07  | 7.39  | 0.05 | 53.20    | 0.1267 |

\*Significant p values following Bonferoni corrections
