# Supplementary material for: Broadening risk profile in familial colorectal cancer type X; increased risk for five cancer types in the national Danish cohort
Source: Springer Nature journal article supplement (doi:10.1186/s12885-020-06859-5), 2020-04-22
Supplement: MOESM5 [file 17918908]

**Supplementary Table 4.** Age-dependent incidence rates for cancer types in the entire FCCTX cohort compared to the Danish Lynch syndrome cohort.

| Cancer                           | Age groups | FCCTX per 100000 years |              |              | Lynch syndrome per 100000 years |              |              | FCCTX vs. Lynch syndrome |              |              |                    |
|----------------------------------|------------|------------------------|--------------|--------------|---------------------------------|--------------|--------------|--------------------------|--------------|--------------|--------------------|
|                                  |            | IR                     | 95% CI lower | 95% CI Upper | IR                              | 95% CI lower | 95% CI Upper | IRR                      | 95% CI lower | 95% CI Upper | P values           |
| <b>Breast cancer</b>             | 0-29       | 0.00                   | 0.00         | 19.08        | 9.11                            | 0.23         | 50.77        | 0.00                     | 0.00         | 90.25        | 0.3621             |
|                                  | 30-49      | 153.79                 | 102.99       | 220.86       | 150.70                          | 84.34        | 248.55       | 1.02                     | 0.45         | 2.48         | 1.0000             |
|                                  | 50-69      | 435.03                 | 326.81       | 567.62       | 530.28                          | 349.46       | 771.53       | 0.82                     | 0.45         | 1.55         | 0.3938             |
|                                  | 70+        | 445.01                 | 271.83       | 687.29       | 383.20                          | 104.41       | 981.13       | 1.16                     | 0.31         | 7.16         | 1.0000             |
| <b>Prostate cancer</b>           | 0-29       | 0.00                   | 0.00         | 18.99        | 0.00                            | 0.00         | 37.17        | NA                       | 0.00         | Inf          | 1.0000             |
|                                  | 30-49      | 0.00                   | 0.00         | 19.26        | 0.00                            | 0.00         | 42.29        | NA                       | 0.00         | Inf          | 1.0000             |
|                                  | 50-69      | 210.97                 | 137.81       | 309.11       | 391.12                          | 227.84       | 626.22       | 0.54                     | 0.24         | 1.27         | 0.0549             |
|                                  | 70+        | 742.25                 | 480.35       | 1095.71      | 983.36                          | 395.36       | 2026.09      | 0.75                     | 0.26         | 2.77         | 0.4860             |
| <b>Urothelial cancer</b>         | 0-29       | 2.58                   | 0.07         | 14.35        | 9.57                            | 1.16         | 34.57        | 0.27                     | 0.00         | 11.07        | 0.2817             |
|                                  | 30-49      | 2.62                   | 0.07         | 14.59        | 42.86                           | 18.51        | 84.46        | 0.06                     | 0.00         | 0.65         | <b>0.0009*</b>     |
|                                  | 50-69      | 55.18                  | 30.17        | 92.59        | 497.68                          | 365.68       | 661.81       | 0.11                     | 0.05         | 0.24         | <b>&lt;0.0001*</b> |
|                                  | 70+        | 355.87                 | 238.33       | 511.09       | 1130.28                         | 669.87       | 1786.33      | 0.31                     | 0.14         | 0.72         | <b>0.0003*</b>     |
| <b>Lung cancer</b>               | 0-29       | 0.00                   | 0.00         | 9.50         | 0.00                            | 0.00         | 17.65        | NA                       | 0.00         | Inf          | 1.0000             |
|                                  | 30-49      | 13.09                  | 4.25         | 30.55        | 37.34                           | 15.01        | 76.94        | 0.35                     | 0.06         | 1.77         | 0.0707             |
|                                  | 50-69      | 74.75                  | 45.00        | 116.73       | 143.60                          | 78.51        | 240.94       | 0.52                     | 0.20         | 1.38         | 0.0779             |
|                                  | 70+        | 193.14                 | 110.40       | 313.65       | 109.68                          | 13.28        | 396.21       | 1.76                     | 0.31         | 33.03        | 0.7577             |
| <b>Malignant melanoma</b>        | 0-29       | 7.73                   | 1.59         | 22.59        | 14.36                           | 2.96         | 41.97        | 0.54                     | 0.04         | 6.97         | 0.4283             |
|                                  | 30-49      | 23.59                  | 10.79        | 44.79        | 26.80                           | 8.70         | 62.53        | 0.88                     | 0.20         | 4.87         | 0.7827             |
|                                  | 50-69      | 27.59                  | 11.09        | 56.84        | 20.59                           | 2.49         | 74.38        | 1.34                     | 0.18         | 27.76        | 1.0000             |
|                                  | 70+        | 60.78                  | 19.73        | 141.83       | 165.58                          | 34.15        | 483.90       | 0.37                     | 0.05         | 4.07         | 0.1618             |
| <b>Non-melanoma skin tumours</b> | 0-29       | 2.58                   | 0.07         | 14.36        | 0.00                            | 0.00         | 17.65        | NA                       | 0.00         | Inf          | 1.0000             |
|                                  | 30-49      | 5.24                   | 0.63         | 18.92        | 48.12                           | 22.01        | 91.35        | 0.11                     | 0.01         | 0.73         | <b>0.0012*</b>     |
|                                  | 50-69      | 39.39                  | 18.89        | 72.44        | 228.51                          | 143.20       | 345.96       | 0.17                     | 0.06         | 0.46         | <b>&lt;0.0001*</b> |
|                                  | 70+        | 109.83                 | 50.22        | 208.49       | 462.53                          | 199.69       | 911.38       | 0.24                     | 0.06         | 0.94         | <b>0.0046*</b>     |
| <b>Brain tumours</b>             | 0-29       | 7.73                   | 1.59         | 22.60        | 9.57                            | 1.16         | 34.57        | 0.81                     | 0.05         | 20.46        | 1.0000             |
|                                  | 30-49      | 13.10                  | 4.25         | 30.57        | 53.46                           | 25.63        | 98.31        | 0.25                     | 0.05         | 1.04         | <b>0.0102*</b>     |
|                                  | 50-69      | 31.47                  | 13.59        | 62.01        | 92.53                           | 42.31        | 175.66       | 0.34                     | 0.09         | 1.31         | 0.0283             |
|                                  | 70+        | 72.50                  | 26.61        | 157.80       | 0.00                            | 0.00         | 204.83       | NA                       | 0.16         | Inf          | 0.5993             |
| <b>Pancreatic cancer</b>         | 0-29       | 0.00                   | 0.00         | 9.51         | 0.00                            | 0.00         | 17.65        | NA                       | 0.00         | Inf          | 1.0000             |
|                                  | 30-49      | 0.00                   | 0.00         | 9.66         | 5.34                            | 0.14         | 29.73        | 0.00                     | 0.00         | 78.01        | 0.3291             |
|                                  | 50-69      | 27.53                  | 11.07        | 56.72        | 71.76                           | 28.85        | 147.86       | 0.38                     | 0.08         | 1.76         | 0.0746             |
|                                  | 70+        | 169.16                 | 92.48        | 283.82       | 274.66                          | 89.18        | 640.95       | 0.66                     | 0.18         | 3.35         | 0.3872             |
| <b>Gastric cancer</b>            | 0-29       | 0.00                   | 0.00         | 9.50         | 0.00                            | 0.00         | 17.65        | NA                       | 0.00         | Inf          | 1.0000             |
|                                  | 30-49      | 15.71                  | 5.76         | 34.19        | 21.36                           | 5.82         | 54.68        | 0.74                     | 0.12         | 5.51         | 0.7383             |
|                                  | 50-69      | 15.73                  | 4.29         | 40.27        | 123.79                          | 63.97        | 216.24       | 0.13                     | 0.02         | 0.55         | <b>0.0001*</b>     |
|                                  | 70+        | 120.69                 | 57.88        | 221.96       | 275.53                          | 89.47        | 643.00       | 0.44                     | 0.10         | 2.38         | 0.1672             |

|                                  |       |       |       |        |         |         |         |      |      |        |          |
|----------------------------------|-------|-------|-------|--------|---------|---------|---------|------|------|--------|----------|
| <b>Ovarian cancer</b>            | 0-29  | 10.31 | 1.25  | 37.26  | 0.00    | 0.00    | 33.61   | NA   | 0.05 | Inf    | 0.5384   |
|                                  | 30-49 | 10.51 | 1.27  | 37.95  | 252.67  | 163.51  | 372.99  | 0.04 | 0.00 | 0.22   | <0.0001* |
|                                  | 50-69 | 69.27 | 31.67 | 131.49 | 96.36   | 31.29   | 224.86  | 0.72 | 0.16 | 3.98   | 0.5594   |
|                                  | 70+   | 84.24 | 22.95 | 215.70 | 0.00    | 0.00    | 343.62  | NA   | 0.09 | Inf    | 1.0000   |
| <b>Non-Hodgkin's lymphoma</b>    | 0-29  | 0.00  | 0.00  | 9.50   | 4.78    | 0.12    | 26.66   | 0.00 | 0.00 | 85.61  | 0.3500   |
|                                  | 30-49 | 7.86  | 1.62  | 22.96  | 5.33    | 0.14    | 29.72   | 1.47 | 0.07 | 313.00 | 1.0000   |
|                                  | 50-69 | 31.52 | 13.61 | 62.10  | 0.00    | 0.00    | 37.78   | NA   | 0.43 | Inf    | 0.1164   |
|                                  | 70+   | 48.36 | 13.18 | 123.81 | 0.00    | 0.00    | 202.26  | NA   | 0.09 | Inf    | 1.0000   |
| <b>Head and neck tumours</b>     | 0-29  | 0.00  | 0.00  | 9.50   | 0.00    | 0.00    | 17.65   | NA   | 0.00 | Inf    | 1.0000   |
|                                  | 30-49 | 5.24  | 0.63  | 18.91  | 0.00    | 0.00    | 19.68   | NA   | 0.04 | Inf    | 1.0000   |
|                                  | 50-69 | 35.43 | 16.20 | 67.25  | 10.24   | 0.26    | 57.07   | 3.46 | 0.34 | 612.79 | 0.3020   |
|                                  | 70+   | 48.40 | 13.19 | 123.92 | 55.34   | 1.40    | 308.34  | 0.87 | 0.05 | 174.25 | 1.0000   |
| <b>Endometrial cancer</b>        | 0-29  | 0.00  | 0.00  | 19.02  | 0.00    | 0.00    | 33.61   | NA   | 0.00 | Inf    | 1.0000   |
|                                  | 30-49 | 0.00  | 0.00  | 19.37  | 688.64  | 535.80  | 871.52  | 0.00 | 0.00 | 0.04   | <0.0001* |
|                                  | 50-69 | 53.71 | 21.59 | 110.65 | 1686.10 | 1355.83 | 2072.51 | 0.03 | 0.01 | 0.08   | <0.0001* |
|                                  | 70+   | 83.83 | 22.84 | 214.63 | 367.68  | 100.18  | 941.39  | 0.23 | 0.03 | 1.92   | 0.0441   |
| <b>Kidney cancer</b>             | 0-29  | 0.00  | 0.00  | 9.50   | 0.00    | 0.00    | 17.65   | NA   | 0.00 | Inf    | 1.0000   |
|                                  | 30-49 | 2.62  | 0.07  | 14.59  | 5.33    | 0.14    | 29.72   | 0.49 | 0.00 | 156.30 | 0.5500   |
|                                  | 50-69 | 23.59 | 8.66  | 51.35  | 102.83  | 49.31   | 189.11  | 0.23 | 0.05 | 0.91   | 0.0038*  |
|                                  | 70+   | 36.18 | 7.46  | 105.75 | 110.52  | 13.38   | 399.25  | 0.33 | 0.02 | 8.29   | 0.2207   |
| <b>Cervical cancer</b>           | 0-29  | 0.00  | 0.00  | 19.02  | 9.11    | 0.23    | 50.76   | 0.00 | 0.00 | 89.99  | 0.3614   |
|                                  | 30-49 | 26.34 | 8.55  | 61.47  | 70.21   | 28.23   | 144.66  | 0.38 | 0.06 | 1.90   | 0.1242   |
|                                  | 50-69 | 23.15 | 4.77  | 67.64  | 38.07   | 4.61    | 137.51  | 0.61 | 0.04 | 15.40  | 0.6303   |
|                                  | 70+   | 21.01 | 0.53  | 117.05 | 0.00    | 0.00    | 342.71  | NA   | 0.00 | Inf    | 1.0000   |
| <b>Leukemia</b>                  | 0-29  | 0.00  | 0.00  | 9.50   | 0.00    | 0.00    | 17.65   | NA   | 0.00 | Inf    | 1.0000   |
|                                  | 30-49 | 0.00  | 0.00  | 9.66   | 0.00    | 0.00    | 19.68   | NA   | 0.00 | Inf    | 1.0000   |
|                                  | 50-69 | 11.79 | 2.43  | 34.45  | 10.24   | 0.26    | 57.08   | 1.15 | 0.05 | 244.51 | 1.0000   |
|                                  | 70+   | 48.32 | 13.16 | 123.71 | 54.91   | 1.39    | 305.96  | 0.88 | 0.05 | 175.31 | 1.0000   |
| <b>Esophageal cancer</b>         | 0-29  | 0.00  | 0.00  | 9.50   | 0.00    | 0.00    | 17.65   | NA   | 0.00 | Inf    | 1.0000   |
|                                  | 30-49 | 0.00  | 0.00  | 9.66   | 5.33    | 0.14    | 29.72   | 0.00 | 0.00 | 78.04  | 0.3292   |
|                                  | 50-69 | 15.72 | 4.28  | 40.25  | 30.74   | 6.34    | 89.85   | 0.51 | 0.05 | 6.02   | 0.4049   |
|                                  | 70+   | 24.17 | 2.93  | 87.33  | 0.00    | 0.00    | 202.26  | NA   | 0.02 | Inf    | 1.0000   |
| <b>Connecting tissue tumours</b> | 0-29  | 0.00  | 0.00  | 9.50   | 4.79    | 0.12    | 26.67   | 0.00 | 0.00 | 85.58  | 0.3499   |
|                                  | 30-49 | 5.24  | 0.63  | 18.92  | 5.34    | 0.14    | 29.74   | 0.98 | 0.02 | 234.47 | 1.0000   |
|                                  | 50-69 | 11.80 | 2.43  | 34.47  | 30.76   | 6.34    | 89.89   | 0.38 | 0.03 | 4.97   | 0.3573   |
|                                  | 70+   | 12.06 | 0.31  | 67.18  | 55.57   | 1.41    | 309.63  | 0.22 | 0.00 | 69.11  | 0.3248   |
| <b>Testis cancer</b>             | 0-29  | 5.15  | 0.13  | 28.69  | 30.28   | 6.24    | 88.48   | 0.17 | 0.00 | 3.75   | 0.1152   |
|                                  | 30-49 | 26.21 | 8.51  | 61.17  | 34.59   | 7.13    | 101.09  | 0.76 | 0.10 | 8.39   | 0.7113   |
|                                  | 50-69 | 0.00  | 0.00  | 29.77  | 0.00    | 0.00    | 84.04   | NA   | 0.00 | Inf    | 1.0000   |
|                                  | 70+   | 0.00  | 0.00  | 104.73 | 0.00    | 0.00    | 501.29  | NA   | 0.00 | Inf    | 1.0000   |

|                                 |       |       |       |        |        |       |        |      |      |        |         |
|---------------------------------|-------|-------|-------|--------|--------|-------|--------|------|------|--------|---------|
| <b>Biliary tract cancer</b>     | 0-29  | 0.00  | 0.00  | 9.50   | 0.00   | 0.00  | 17.65  | NA   | 0.00 | Inf    | 1.0000  |
|                                 | 30-49 | 5.24  | 0.63  | 18.91  | 5.33   | 0.14  | 29.72  | 0.98 | 0.02 | 234.61 | 1.0000  |
|                                 | 50-69 | 7.86  | 0.95  | 28.39  | 10.24  | 0.26  | 57.07  | 0.77 | 0.02 | 183.36 | 1.0000  |
|                                 | 70+   | 12.06 | 0.31  | 67.18  | 54.83  | 1.39  | 305.50 | 0.22 | 0.00 | 70.03  | 0.3280  |
| <b>Eye tumours</b>              | 0-29  | 0.00  | 0.00  | 9.50   | 0.00   | 0.00  | 17.65  | NA   | 0.00 | Inf    | 1.0000  |
|                                 | 30-49 | 0.00  | 0.00  | 9.66   | 10.68  | 1.29  | 38.57  | 0.00 | 0.00 | 5.71   | 0.1082  |
|                                 | 50-69 | 19.66 | 6.38  | 45.88  | 10.25  | 0.26  | 57.11  | 1.92 | 0.14 | 366.93 | 1.0000  |
|                                 | 70+   | 0.00  | 0.00  | 44.53  | 0.00   | 0.00  | 202.26 | NA   | 0.00 | Inf    | 1.0000  |
| <b>Multiple myeloma</b>         | 0-29  | 0.00  | 0.00  | 9.50   | 0.00   | 0.00  | 17.65  | NA   | 0.00 | Inf    | 1.0000  |
|                                 | 30-49 | 0.00  | 0.00  | 9.66   | 5.33   | 0.14  | 29.72  | 0.00 | 0.00 | 78.02  | 0.3292  |
|                                 | 50-69 | 3.93  | 0.10  | 21.89  | 10.25  | 0.26  | 57.11  | 0.38 | 0.00 | 122.07 | 0.4774  |
|                                 | 70+   | 48.28 | 13.16 | 123.62 | 109.67 | 13.28 | 396.18 | 0.44 | 0.04 | 10.26  | 0.2966  |
| <b>Laryngeal cancer</b>         | 0-29  | 0.00  | 0.00  | 9.50   | 0.00   | 0.00  | 17.65  | NA   | 0.00 | Inf    | 1.0000  |
|                                 | 30-49 | 0.00  | 0.00  | 9.66   | 0.00   | 0.00  | 19.68  | NA   | 0.00 | Inf    | 1.0000  |
|                                 | 50-69 | 15.73 | 4.28  | 40.27  | 30.79  | 6.35  | 89.99  | 0.51 | 0.05 | 6.02   | 0.4047  |
|                                 | 70+   | 12.08 | 0.31  | 67.32  | 0.00   | 0.00  | 202.67 | NA   | 0.00 | Inf    | 1.0000  |
| <b>Hepatocellular cancer</b>    | 0-29  | 0.00  | 0.00  | 9.50   | 0.00   | 0.00  | 17.65  | NA   | 0.00 | Inf    | 1.0000  |
|                                 | 30-49 | 0.00  | 0.00  | 9.66   | 5.33   | 0.14  | 29.72  | 0.00 | 0.00 | 78.02  | 0.3292  |
|                                 | 50-69 | 15.72 | 4.28  | 40.24  | 30.76  | 6.34  | 89.89  | 0.51 | 0.05 | 6.02   | 0.4048  |
|                                 | 70+   | 0.00  | 0.00  | 44.48  | 109.67 | 13.28 | 396.16 | 0.00 | 0.00 | 2.56   | 0.0325  |
| <b>Small bowel cancer</b>       | 0-29  | 0.00  | 0.00  | 9.50   | 0.00   | 0.00  | 17.65  | NA   | 0.00 | Inf    | 1.0000  |
|                                 | 30-49 | 2.62  | 0.07  | 14.59  | 42.73  | 18.45 | 84.20  | 0.06 | 0.00 | 0.66   | 0.0009* |
|                                 | 50-69 | 3.93  | 0.10  | 21.90  | 93.04  | 42.54 | 176.62 | 0.04 | 0.00 | 0.43   | 0.0001* |
|                                 | 70+   | 12.06 | 0.31  | 67.20  | 110.95 | 13.44 | 400.80 | 0.11 | 0.00 | 4.47   | 0.0843  |
| <b>Vaginal and vulva cancer</b> | 0-29  | 0.00  | 0.00  | 19.02  | 0.00   | 0.00  | 33.61  | NA   | 0.00 | Inf    | 1.0000  |
|                                 | 30-49 | 5.25  | 0.13  | 29.25  | 0.00   | 0.00  | 36.79  | NA   | 0.00 | Inf    | 1.0000  |
|                                 | 50-69 | 7.67  | 0.19  | 42.76  | 37.44  | 4.53  | 135.25 | 0.20 | 0.00 | 8.43   | 0.2045  |
|                                 | 70+   | 20.96 | 0.53  | 116.79 | 0.00   | 0.00  | 339.29 | NA   | 0.00 | Inf    | 1.0000  |
| <b>Thyroid cancer</b>           | 0-29  | 0.00  | 0.00  | 9.50   | 0.00   | 0.00  | 17.65  | NA   | 0.00 | Inf    | 1.0000  |
|                                 | 30-49 | 0.00  | 0.00  | 9.66   | 5.33   | 0.14  | 29.72  | 0.00 | 0.00 | 78.03  | 0.3292  |
|                                 | 50-69 | 3.93  | 0.10  | 21.90  | 10.25  | 0.26  | 57.12  | 0.38 | 0.00 | 122.09 | 0.4774  |
|                                 | 70+   | 12.07 | 0.31  | 67.24  | 54.84  | 1.39  | 305.55 | 0.22 | 0.00 | 70.09  | 0.3282  |
| <b>Pleural mesothelioma</b>     | 0-29  | 0.00  | 0.00  | 9.50   | 0.00   | 0.00  | 17.65  | NA   | 0.00 | Inf    | 1.0000  |
|                                 | 30-49 | 0.00  | 0.00  | 9.66   | 0.00   | 0.00  | 19.68  | NA   | 0.00 | Inf    | 1.0000  |
|                                 | 50-69 | 3.93  | 0.10  | 21.89  | 0.00   | 0.00  | 37.78  | NA   | 0.00 | Inf    | 1.0000  |
|                                 | 70+   | 0.00  | 0.00  | 44.48  | 54.84  | 1.39  | 305.55 | 0.00 | 0.00 | 34.96  | 0.1802  |
| <b>Bone cancer/osteosarcoma</b> | 0-29  | 2.58  | 0.07  | 14.35  | 4.79   | 0.12  | 26.68  | 0.54 | 0.00 | 171.33 | 1.0000  |
|                                 | 30-49 | 0.00  | 0.00  | 9.66   | 0.00   | 0.00  | 19.68  | NA   | 0.00 | Inf    | 1.0000  |
|                                 | 50-69 | 0.00  | 0.00  | 14.49  | 0.00   | 0.00  | 37.78  | NA   | 0.00 | Inf    | 1.0000  |
|                                 | 70+   | 0.00  | 0.00  | 44.48  | 0.00   | 0.00  | 202.26 | NA   | 0.00 | Inf    | 1.0000  |

|                           |       |       |      |        |       |      |        |      |      |       |        |
|---------------------------|-------|-------|------|--------|-------|------|--------|------|------|-------|--------|
| <b>Hodgkin's lymphoma</b> | 0-29  | 2.58  | 0.07 | 14.36  | 0.00  | 0.00 | 17.65  | NA   | 0.00 | Inf   | 1.0000 |
|                           | 30-49 | 0.00  | 0.00 | 9.66   | 0.00  | 0.00 | 19.68  | NA   | 0.00 | Inf   | 1.0000 |
|                           | 50-69 | 0.00  | 0.00 | 14.49  | 10.24 | 0.26 | 57.07  | 0.00 | 0.00 | 60.99 | 0.2772 |
|                           | 70+   | 0.00  | 0.00 | 44.48  | 0.00  | 0.00 | 202.26 | NA   | 0.00 | Inf   | 1.0000 |
| <b>Nose and sinuses</b>   | 0-29  | 0.00  | 0.00 | 55.74  | 0.00  | 0.00 |        | NA   | 0.00 | Inf   | 1.0000 |
|                           | 30-49 | 0.00  | 0.00 | 34.66  | 0.00  | 0.00 |        | NA   | 0.00 | Inf   | 1.0000 |
|                           | 50-69 | 0.00  | 0.00 | 43.13  | 0.00  | 0.00 |        | NA   | 0.00 | Inf   | 1.0000 |
|                           | 70+   | 35.17 | 0.89 | 195.98 | 0.00  | 0.00 |        | NA   | 0.00 | Inf   | 1.0000 |

\*Significant p values following Bonferoni corrections
